# Supplementary material
Source: PubMed Central journal article supplement (PMC9032211)
Supplement: NIHMS1751653-supplement-Table_E1.pdf [file NIHMS1751653-supplement-Table_E1.pdf]

**Table E1 Cohort characteristics by baseline body weight class**

| Characteristic         | Total             | Baseline body weight class |                  |                  |                  |
|------------------------|-------------------|----------------------------|------------------|------------------|------------------|
|                        |                   | Underweight/normal         | Overweight       | Moderate obese   | Severe obese     |
| N                      | 542,486           | 368,597                    | 86,832           | 27,347           | 59,710           |
| Sex                    |                   |                            |                  |                  |                  |
| Male                   | 261,372<br>(48.2) | 174,739 (47.4)             | 40,170<br>(46.3) | 13,325<br>(48.7) | 33,138<br>(55.5) |
| Female                 | 281,114<br>(51.8) | 193,858 (52.6)             | 46,662<br>(53.7) | 14,022<br>(51.3) | 26,572<br>(44.5) |
| Age (y)                |                   |                            |                  |                  |                  |
| 2-5                    | 163,711<br>(30.2) | 125,643 (34.1)             | 20,228<br>(23.3) | 4774 (17.5)      | 13,066<br>(21.9) |
| 6-11                   | 165,814<br>(30.6) | 106,696 (28.9)             | 27,640<br>(31.8) | 9716 (35.5)      | 21,762<br>(36.4) |
| 12-14                  | 99,501<br>(18.3)  | 61,633 (16.7)              | 18,551<br>(21.4) | 6532 (23.9)      | 12,785<br>(21.4) |
| 15-17                  | 113,460<br>(20.9) | 74,625 (20.2)              | 20,413<br>(23.5) | 6325 (23.1)      | 12,097<br>(20.3) |
| Race and ethnicity     |                   |                            |                  |                  |                  |
| Non-Hispanic/White     | 138,703<br>(25.6) | 105,290 (28.6)             | 19,067<br>(22.0) | 5151 (18.8)      | 9195<br>(15.4)   |
| Hispanic               | 290,582<br>(53.6) | 181,428 (49.2)             | 51,264<br>(59.0) | 17,349<br>(63.4) | 40,541<br>(67.9) |
| Black                  | 38,971 (7.2)      | 26,592 (7.2)               | 6286 (7.2)       | 1905 (7.0)       | 4188 (7.0)       |
| Asian/Pacific Islander | 39,626 (7.3)      | 31,080 (8.4)               | 4844 (5.6)       | 1355 (5.0)       | 2347 (3.9)       |
| Other/unknown          | 34,604 (6.4)      | 24,207 (6.6)               | 5371 (6.2)       | 1587 (5.8)       | 3439 (5.8)       |

| Characteristic                                   | Total             | Baseline body weight class |                  |                  |                  |
|--------------------------------------------------|-------------------|----------------------------|------------------|------------------|------------------|
|                                                  |                   | Underweight/normal         | Overweight       | Moderate obese   | Severe obese     |
| Government health care assistance                |                   |                            |                  |                  |                  |
| No                                               | 422,767<br>(77.9) | 291,589 (79.1)             | 66,366<br>(76.4) | 20,506<br>(75.0) | 44,306<br>(74.2) |
| Yes                                              | 119,719<br>(22.1) | 77,008 (20.9)              | 20,466<br>(23.6) | 6841 (25.0)      | 15,404<br>(25.8) |
| Moderate-to-vigorous physical activity<br>(h/wk) |                   |                            |                  |                  |                  |
| 0-1                                              | 96,057<br>(17.7)  | 63,756 (17.3)              | 15,038<br>(17.3) | 4982 (18.2)      | 12,281<br>(20.6) |
| 1-4                                              | 116,318<br>(21.4) | 74,133 (20.1)              | 19,829<br>(22.8) | 6862 (25.1)      | 15,494<br>(25.9) |
| 4.1-7.9                                          | 117,395<br>(21.6) | 77,142 (20.9)              | 19,983<br>(23.0) | 6474 (23.7)      | 13,796<br>(23.1) |
| 8+                                               | 212,716<br>(39.2) | 153,566 (41.7)             | 31,982<br>(36.8) | 9029 (33.0)      | 18,139<br>(30.4) |
