# Supplementary material
Source: PubMed Central journal article supplement (PMC9032211)
Supplement: NIHMS1751653-supplement-Table_E2.pdf [file NIHMS1751653-supplement-Table_E2.pdf]

**Table E2 Characteristics of eligible youth included into the cohort compared with those excluded**

| Characteristic                    | KPSC members 2-17 y in 2010-2017 | Eligible for cohort | Analytical cohort |
|-----------------------------------|----------------------------------|---------------------|-------------------|
| N                                 | 1,695,832                        | 953,388             | 542,486           |
| Sex                               |                                  |                     |                   |
| Male                              | 865,005 (51.0)                   | 464,472 (48.7)      | 261,372 (48.2)    |
| Female                            | 830,827 (49.0)                   | 488,916 (51.3)      | 281,114 (51.8)    |
| Age (y)                           |                                  |                     |                   |
| 2-5                               | 504,469 (33.6)                   | 356,631 (37.4)      | 163,711 (30.2)    |
| 6-11                              | 429,613 (28.6)                   | 261,906 (27.5)      | 165,814 (30.6)    |
| 12-14                             | 247,898 (16.5)                   | 149,670 (15.7)      | 99,501 (18.3)     |
| 15-17                             | 318,316 (21.2)                   | 185,033 (19.4)      | 113,460 (20.9)    |
| Other/missing                     | 195,536                          | 148                 | –                 |
| Race and ethnicity                |                                  |                     |                   |
| Non-Hispanic White                | 407,800 (24.0)                   | 244,122 (25.6)      | 138,703 (25.6)    |
| Hispanic                          | 819,602 (48.3)                   | 488,798 (51.3)      | 290,582 (53.6)    |
| Black                             | 133,610 (7.9)                    | 64,641 (6.8)        | 38,971 (7.2)      |
| Asian/Pacific Islander            | 130,631 (7.7)                    | 80,613 (8.5)        | 39,626 (7.3)      |
| Other/unknown                     | 204,189 (12.0)                   | 75,214 (7.9)        | 34,604 (6.4)      |
| Government health care assistance |                                  |                     |                   |
| No                                | 1356,994 (80.0)                  | 744,768 (78.1)      | 422,767 (77.9)    |

| Characteristic                                | KPSC members 2-17 y in 2010-2017 | Eligible for cohort | Analytical cohort |
|-----------------------------------------------|----------------------------------|---------------------|-------------------|
| Yes                                           | 338,838 (20.0)                   | 208,620 (21.9)      | 119,719 (22.1)    |
| BMI-for-age class                             |                                  |                     |                   |
| Underweight/normal                            | 959,898 (67.6)                   | 624,628 (69.5)      | 368,597 (67.9)    |
| Overweight                                    | 224,535 (15.8)                   | 137,604 (15.3)      | 86,832 (16.0)     |
| Moderate obese                                | 71,581 (5.0)                     | 42,462 (4.7)        | 27,347 (5.0)      |
| Severe obese                                  | 163,511 (11.5)                   | 93,617 (10.4)       | 59,710 (11.0)     |
| Other/missing                                 | 276,307                          | 55,077              | –                 |
| Moderate-to-vigorous physical activity (h/wk) |                                  |                     |                   |
| 0-1                                           | 165,337 (18.0)                   | 98,951 (17.9)       | 96,057 (17.7)     |
| 1-4                                           | 206,132 (22.5)                   | 118,609 (21.5)      | 116,318 (21.4)    |
| 4.1-7.9                                       | 198,842 (21.7)                   | 119,215 (21.6)      | 117,395 (21.6)    |
| 8+                                            | 345,992 (37.8)                   | 214,812 (38.9)      | 212,716 (39.2)    |
| Missing                                       | 779,529                          | 401,801             | –                 |
| BMI                                           |                                  |                     |                   |
| N                                             | 1,419,525                        | 898,311             | 542,486           |
| Mean (SD)                                     | 19.6 (4.91)                      | 19.3 (4.75)         | 19.7 (4.88)       |
| Median                                        | 18.2                             | 17.8                | 18.3              |
| Q1, Q3                                        | 16.0, 22.1                       | 15.9, 21.6          | 16.0, 22.2        |
| Moderate-to-vigorous physical activity (h/wk) |                                  |                     |                   |
| N                                             | 916,303                          | 551,587             | 542,486           |

| Characteristic | KPSC members 2-17 y in 2010-2017 | Eligible for cohort | Analytical cohort |
|----------------|----------------------------------|---------------------|-------------------|
| Mean (SD)      | 5.3 (4.36)                       | 5.4 (4.36)          | 5.4 (4.36)        |
| Median         | 5                                | 5                   | 5                 |
| Q1, Q3         | 2.5, 7.0                         | 2.5, 7.0            | 2.5, 7.0          |

**BMI**, Body mass index; **KPSC**, Kaiser Permanente Southern California; **SD**, standard deviation.
