# Supplementary material
Source: PubMed Central journal article supplement (PMC9032211)
Supplement: NIHMS1751653-supplement-Table_E3.pdf [file NIHMS1751653-supplement-Table_E3.pdf]

**Table E3 Adjusted hazard ratios (HR) for incident asthma risk by current MVPA level and increase of MVPA by 1 hour/week for sensitivity analyses excluding incident asthma that occurred during the first 6 months of follow-up, excluding MVPA reports in children aged 2-4 years, and without imputation for missing physical activity or BMI**

| Sensitivity model:        | HR (95% CI)                       |                                               |
|---------------------------|-----------------------------------|-----------------------------------------------|
|                           | Excluding cases during first 6 mo | Excluding MVPA reports in children aged 2-4 y |
| N                         | 542,486                           | 499,582                                       |
| Cases (n)                 | 15,134                            | 13,582                                        |
| Current MVPA level (h/wk) |                                   |                                               |
| 0                         | 0.981 (0.973, 0.990)              | 0.989 (0.978, 0.999)                          |
| 2                         | 0.987 (0.981, 0.994)              | 0.993 (0.985, 1.002)                          |
| 4                         | 0.993 (0.988, 0.998)              | 0.998 (0.992, 1.005)                          |
| 6                         | 0.999 (0.996, 1.003)              | 1.004 (0.999, 1.008)                          |
| 8                         | 1.005 (1.002, 1.009)              | 1.009 (1.004, 1.013)                          |
| 10                        | 1.011 (1.007, 1.016)              | 1.014 (1.004, 1.019)                          |
| 12                        | 1.017 (1.011, 1.023)              | 1.019 (1.011, 1.026)                          |
| 14                        | 1.023 (1.015, 1.031)              | 1.024 (1.014, 1.034)                          |
| 16                        | 1.029 (1.019, 1.040)              | 1.029 (1.017, 1.042)                          |
| 18                        | 1.036 (1.023, 1.048)              | 1.034 (1.019, 1.050)                          |
| 20                        | 1.042 (1.027, 1.057)              | 1.039 (1.022, 1.062)                          |

Adjusted for sex, race and ethnicity, government health care assistance and stratified by baseline year. Missing values for BMI or MVPA were imputed.

*BMI*, Body mass index; *CI*, confidence interval; *MVPA*, moderate-to-vigorous physical activity.
